# Supplementary material for: Assessing agriculture's vulnerability to drought in European pre-Alpine regions
Source: Copernicus journal article supplement (doi:10.5194/nhess-23-45-2023), 2023-01-12
Supplement: Supplementary file 1 [file nhess-23-45-2023-supplement.pdf]

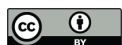

*Supplement of*

## **Assessing agriculture's vulnerability to drought in European pre-Alpine regions**

**Ruth Stephan et al.**

*Correspondence to:* Ruth Stephan ([ruth.stephan@hydrology.uni-freiburg.de](mailto:ruth.stephan@hydrology.uni-freiburg.de))

The copyright of individual parts of the supplement might differ from the article licence.

## S1 Semi-structured interview with each of the experts to identify vulnerability factors

The semi-structured interviews were held online and individually with each expert between the 24<sup>th</sup> August to 9<sup>th</sup> September 2021. The interviews followed the below presented questions (see Table S1) with a flexible interactive structure allowing to integrate the established questions with further information on the context and expertise from each participant. Therefore, the discussions were supported by slides documenting answers and explanations.

**Table S1.** Established questions guiding through the semi-structured interviews.

***Identifying and directing the vulnerability factors:*** Some factors can make the agricultural sector more vulnerable to drought, others can make it less vulnerable.

1. Can you list these factors for Thurgau/Podravskaa?
2. Can you specify if such factors are making the region less or more vulnerable?
3. Can you explain how/why?
4. Now we show you what other stakeholders answered/ we included so far in our study. Do you agree with these selected factors?
5. Can you specify if such (previously identified) factors are making the region less or more vulnerable?

***Importance rating of the factors contributing to the regions' vulnerability:***

6. Here are all the factors you selected as increasing vulnerability to drought. How important from low, medium and high are these factors in increasing vulnerability (with "high" means the factor has a high effect making the region more vulnerable)?
7. Here are all the factors you selected as decreasing vulnerability to drought. How important from low, medium and high are these factors in decreasing vulnerability (with "high" means the factor has a high effect making the region less vulnerable)?

***Indicators to represent the factors quantitatively:***

8. Here are factors which were previously identified. For each factor we identified an indicator and available data to describe how the factor varies temporally and spatially throughout the Thurgau region.
  - a. Do you think the indicators well describes/characterise the respective factors?
  - b. Is there any other indicator (with available data) we could use to describe the respective factor?

## S2 Participatory validation of the mapped factors and vulnerability

The participatory validation was held online with two groups, one consisting of the experts for Podravskaa and held on the 10<sup>th</sup> June, 2022 and the other consisting of the experts for Thurgau held on 21<sup>st</sup> June, 2022. The discussion followed the below presented questions (see Table S2) with a flexible interactive structure allowing to integrate the established questions with further information on the context and expertise from all participants. Therefore, the discussions were supported by slides documenting answers and explanations.

**Table S2.** Established questions guiding through participatory validation.

***Assembling region-specific knowledge about most and least vulnerable subregions:***

- According to your perception/knowledge, where do you think agricultural areas are more vulnerable to drought in Thurgau/Podravška?
- According to your perception/knowledge, where do you think agricultural areas are less vulnerable to drought in Thurgau/Podravška?

***Validating the single factor maps that received highest importance according to the previous interview (between the 24<sup>th</sup> August to 9<sup>th</sup> September 2021):***

**Podravška:**

- Do the maps present reasonable differences in soil texture, irrigated land, tourist farms and access to local food market across Podravška? Do the maps make sense to you?
  - Soil texture more coarse (higher vulnerability) in the center of the region between Maribor and Ptuj
  - Permanently irrigated land mainly located in the center and along the river (lower vulnerability)
  - Is the region in the East more touristic?
  - Is the access to local food market lower in the North and South?

**Thurgau:**

- Do the maps present reasonable differences in distance to large water bodies, irrigated land, humus content, soil texture, and water holding capacity across Thurgau? Do the maps make sense to you?
  - Distance to large water bodies large between Lake Constance and the rivers Thur and Murg, as well as in the South (higher vulnerability)?
  - Is the permanently irrigated land homogenous distributed rather homogeneous across Thurgau with slightly less irrigation in the South, at the coastline and along the river Thur?
  - Is the humus content high along the river Thur, and apart from that very low?
  - Are the clay-rich soil patches in areas in the Northwest, along the river Thur and between the cities Frauenfeld and Sirmach?
  - Is the water holding capacity low in Northern Thurgau?

***Validating the vulnerability aggregated with the equal and expert weighting method:***

- To what extent do you think that the darker red areas have a higher vulnerability to droughts compared to lighter-coloured areas?
- Is there any subregion which is depicted as more or less vulnerable compared to your perception/knowledge?
- Have darker areas experienced greater impacts/damage during past drought events compared to lighter-coloured areas?
- Does the expert weighting map make more sense to you compared to the equal weighting? Why?

## Thurgau

|                                               |
|-----------------------------------------------|
| Type of irrigation infrastructure             |
| Share of 'drought-prone' species              |
| Share of drought resistant species            |
| Share of 'specialty crops' (incl. vegetables) |
| Presence of drought management strategies     |
| Political conservative vote                   |
| Water holding capacity                        |
| Soil texture                                  |
| Share of pastures                             |
| Share of intensive livestock                  |
| Humus content                                 |
| Topsoil depth                                 |
| Southfacing                                   |
| Distance to large water bodies                |
| Presence of irrigation infrastructure         |
| Farm size                                     |
| Slope                                         |
| Altitudes                                     |

## Podravska

|                                           |
|-------------------------------------------|
| Topsoil depth                             |
| Share of 'drought-prone' species          |
| Share of drought resistant species        |
| Presence of drought management strategies |
| Food price                                |
| Farmer's education                        |
| Farmer's age                              |
| Compensation                              |
| Clear landownership                       |
| Agro-technical measures                   |
| Absence of drought policy                 |
| Water permits                             |
| Water holding capacity                    |
| Soil texture                              |
| Slope                                     |
| Presence of irrigation infrastructure     |
| Landscape diversity                       |
| Intensity of farming                      |
| Humus content                             |
| Farm size                                 |
| Farm diversification                      |
| Altitudes                                 |
| Distance to large water bodies            |
| Distance to mountains                     |
| Access to local food market               |

Data not available
  Subregional data available

**Figure S1.** Data availability of vulnerability factors identified by the local experts of Thurgau and Podravska.

**Table S3.** Thurgau’s vulnerability factors with subregional data availability to compute indicators describing the factors quantitatively. For the spatial distribution of the factors see Fig. S2.

| Factor                                | Indicator calculation                                                                                                                                                                                                                                                                                                                                           |
|---------------------------------------|-----------------------------------------------------------------------------------------------------------------------------------------------------------------------------------------------------------------------------------------------------------------------------------------------------------------------------------------------------------------|
| Altitudes                             | Digital elevation model from 2016 (EU-DEM, 2022) used to define altitudes in masl with a resolution of 100m*100m.                                                                                                                                                                                                                                               |
| Slope                                 | Digital elevation model from 2016 (EU-DEM, 2022) used to calculate slope in rad with a resolution of 100m*100m.                                                                                                                                                                                                                                                 |
| Southfacing area                      | Shapefile from 2005 developed to indicate soil features across Thurgau (Amt für Geoinformationen Thurgau, 2022) is used. The feature “Exposure” is used to select hillsides exposed to the South. Then, the southfacing and non-southfacing hillsides are classified to 1 and 0.                                                                                |
| Distance to large water bodies        | Raster showing the distance calculated at each location to the nearest lakes, water reservoirs (national shapefile from 2020 by FOEN) and rivers (European shapefile from 2020 by EU-Hydro). Rivers were filtered to Strahler-Index $\geq 3$ .                                                                                                                  |
| Presence of irrigation infrastructure | Landcover data indicating “permanently irrigated land” from 2018 across Europe with a resolution of 250m*250m is selected (CLC, 2022).                                                                                                                                                                                                                          |
| Farm size                             | The indicator “number of farms > 30 ha” specified for LAU2 from 2019 regions is used (SFSO, 2022).                                                                                                                                                                                                                                                              |
| Share of intensive livestock          | The indicator “Livestock units (LU)” specified for LAU1 from 2020 regions is used (SFSO, 2022).                                                                                                                                                                                                                                                                 |
| Share of pastures                     | The indicator “Number of farms specialized for pasture farming” from 2020 specified for LAU1 regions is used (SFSO, 2022).                                                                                                                                                                                                                                      |
| Soil texture                          | Shapefile from 2005 developed to indicate soil features across Thurgau (Amt für Geoinformationen Thurgau, 2022) is used. The feature “dominant soil texture” is available in 5 classes and used as follows:<br>clay → 1<br>clar rich silt → 2<br>sandy clay → 2<br>clayey loam → 2<br>clar rich sand → 3                                                        |
| Topsoil depth                         | Shapefile from 2005 developed to indicate soil features across Thurgau (Amt für Geoinformationen Thurgau, 2022) is used. The feature “dominant topsoil depth” is available in 5 classes and used as follows:<br>very profound → 1<br>profound → 2<br>moderate profound → 3<br>quite shallow → 4<br>shallow and very shallow → 5                                 |
| Humus content                         | Shapefile from 2006 to indicate soil features across Europe (ESDAC, 2022) is used. The indicator “topsoil organic carbon content [%]” is available in 4 classes and used as follows:<br>high [ $> 6\%$ ] → 1<br>medium [ $2.1\% - 6\%$ ] → 2<br>low [ $1.1\% - 2\%$ ] → 3<br>very low [ $< 2\%$ ] → 4                                                           |
| Water holding capacity                | Shapefile from 2006 to indicate soil features across Europe (ESDAC, 2022) is used. The indicator “topsoil available water capacity [mm]” is available in 4 classes and used as follows:<br>high [ $> 190\text{ mm}$ ] → 1<br>medium [ $140\text{ mm} - 189\text{ mm}$ ] → 2<br>low [ $100\text{ mm} - 139\text{ mm}$ ] → 3<br>very low [ $< 99\text{ mm}$ ] → 4 |

**Table S4.** Podravska's vulnerability factors with subregional data availability to compute indicators describing the factors quantitatively. For the spatial distribution of the factors see Fig. S3.

| Factor                                | Indicator calculation                                                                                                                                                                                                                                                                                                                                                                                           |
|---------------------------------------|-----------------------------------------------------------------------------------------------------------------------------------------------------------------------------------------------------------------------------------------------------------------------------------------------------------------------------------------------------------------------------------------------------------------|
| Altitudes                             | Digital elevation model from 2017 used to define altitudes in masl with a resolution of 100m*100m (INSPIRE, 2022).                                                                                                                                                                                                                                                                                              |
| Slope                                 | Digital elevation model from 2017 used to calculate slope in rad with a resolution of 100m*100m (INSPIRE, 2022).                                                                                                                                                                                                                                                                                                |
| Distance to large water bodies        | Raster showing the distance calculated at each location to the nearest lakes, water reservoirs (national shapefile from 2017 by INSPIRE) and rivers (European shapefile from 2020 by EU-Hydro). Rivers were filtered to Strahler-Index $\geq 3$ .                                                                                                                                                               |
| Distance to mountains                 | Raster showing the distance calculated at each location to the nearest mountain (European mountain areas as defined by the European Environment Agency)                                                                                                                                                                                                                                                         |
| Presence of irrigation infrastructure | Landcover data indicating "permanently irrigated land" from 2018 across Europe with a resolution of 250m*250m is selected (CLC, 2022).                                                                                                                                                                                                                                                                          |
| Intensity of farming                  | Shapefile developed combining information on the agricultural parcels with declared crop for 2020 (INSPIRE, 2022) and the statistical values of annual average yield for 2010 and showing the average agricultural production per each agricultural parcel (SURs, 2022).                                                                                                                                        |
| Farm size                             | Shapefile created with the 2010 data of average utilised agricultural area per agricultural holding [ha] from SURs (2022) for each LAU 2 region.                                                                                                                                                                                                                                                                |
| Landscape diversity                   | Raster showing the Shannon evenness index (SEI) with information on area composition and richness ranging from 0 to 1. SEI is calculated by considering 9 Land Cover classes (CLC, 2018) of numeric matrices, using a moving window algorithm of 5 pixels side and dividing this result by its maximum.                                                                                                         |
| Water permits                         | Shapefile data on the water permits points for 2012 with information on the type of direct water uses (INSPIRE, 2022).                                                                                                                                                                                                                                                                                          |
| Access to local food market           | Shapefile created with the 2010 data on the percentage of agricultural holdings with main destination for sale per each LAU2 region from SURs (2022).                                                                                                                                                                                                                                                           |
| Farm diversification                  | Shapefile created with the 2009/2010 data on the average number of permanent beds per agricultural holding [no] per each LAU2 region from SURs (2022).                                                                                                                                                                                                                                                          |
| Soil texture                          | Shapefile from 2006 to indicate soil features across Europe (ESDAC, 2022) is used. The indicator "Subsoil textural class" is available in 5 classes and used as follows:<br>coarse $\rightarrow 5$<br>medium $\rightarrow 4$<br>medium fine $\rightarrow 3$<br>fine $\rightarrow 2$<br>very fine $\rightarrow 1$                                                                                                |
| Humus content                         | Shapefile from 2006 to indicate soil features across Europe (ESDAC, 2022) is used. The indicator "topsoil organic carbon content [%]" is available in 4 classes and used as follows:<br>high [ $> 6\%$ ] $\rightarrow 1$<br>medium [ $2.1\% - 6\%$ ] $\rightarrow 2$<br>low [ $1.1\% - 2\%$ ] $\rightarrow 3$<br>very low [ $< 2\%$ ] $\rightarrow 4$                                                           |
| Water holding capacity                | Shapefile from 2006 to indicate soil features across Europe (ESDAC, 2022) is used. The indicator "topsoil available water capacity [mm]" is available in 4 classes and used as follows:<br>high [ $> 190\text{ mm}$ ] $\rightarrow 1$<br>medium [ $140\text{ mm} - 189\text{ mm}$ ] $\rightarrow 2$<br>low [ $100\text{ mm} - 139\text{ mm}$ ] $\rightarrow 3$<br>very low [ $< 99\text{ mm}$ ] $\rightarrow 4$ |



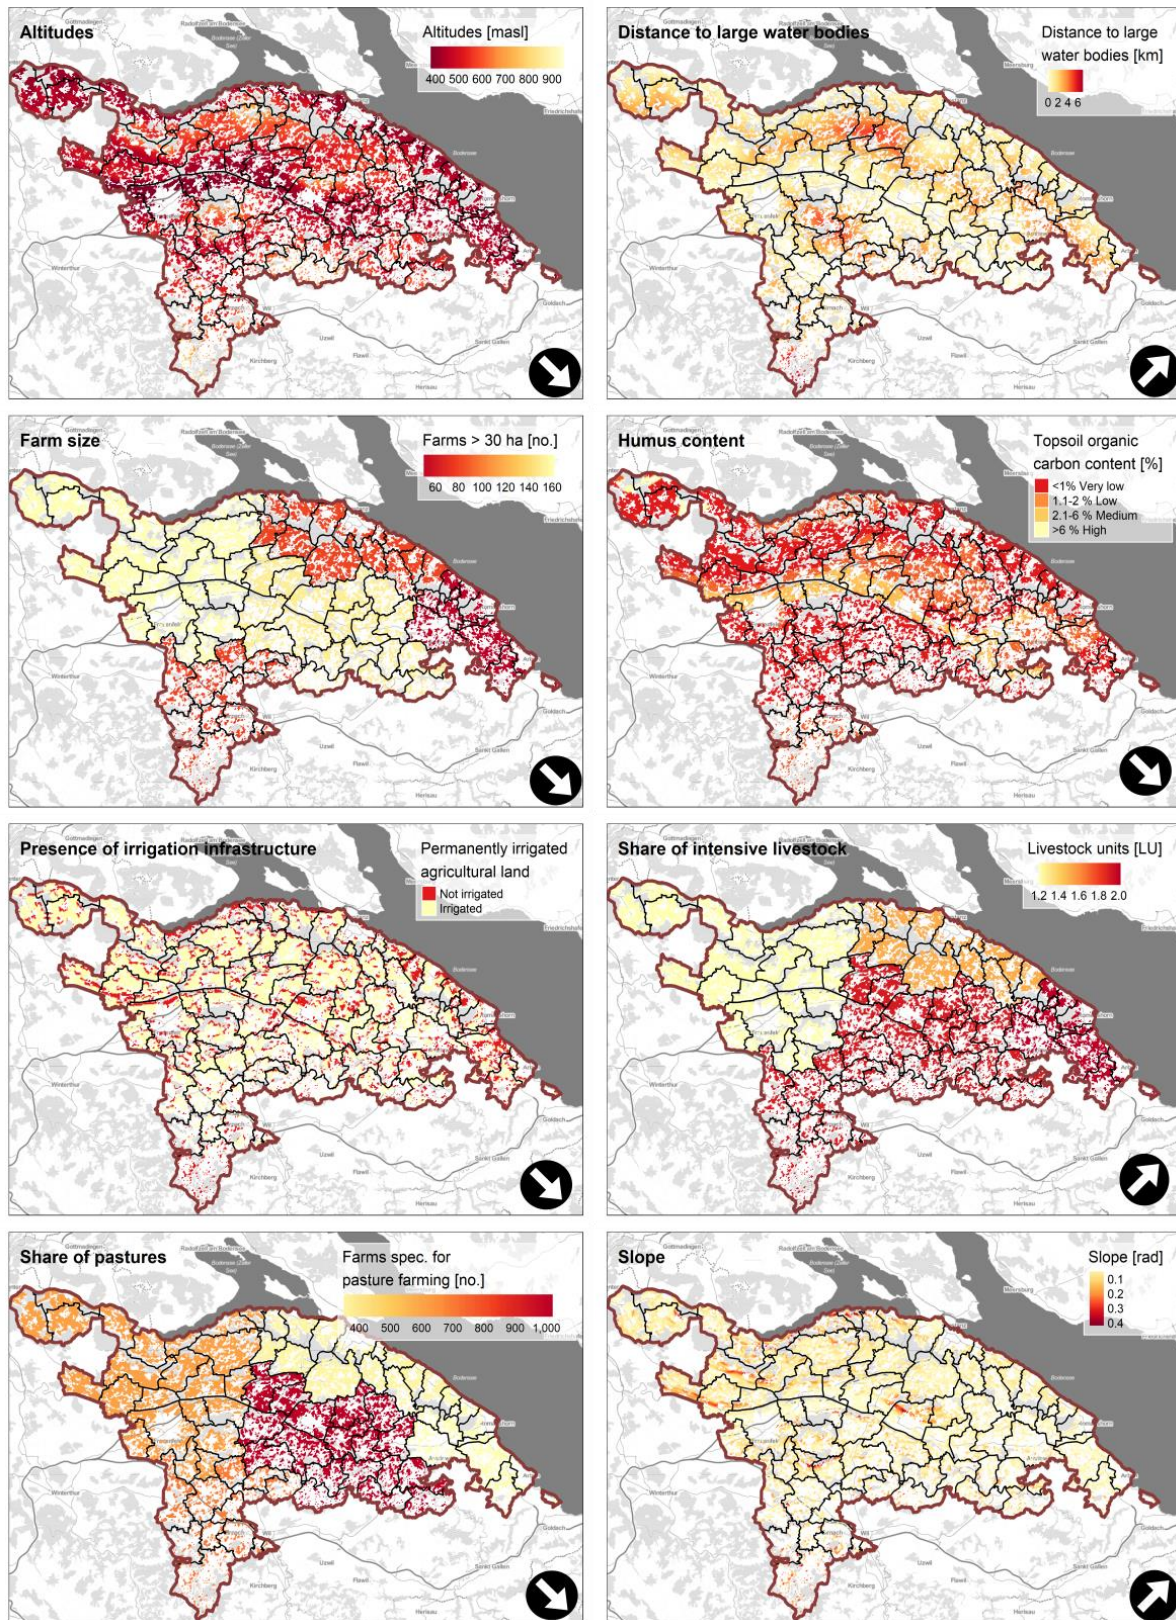

**Figure S2.** Thurgau's factors (bold title) and the selected indicators used for the calculation of the vulnerability maps (see Table 1, Fig. 5) and masked with agricultural used land. The factor's increasing or decreasing effect on the vulnerability is indicated by the arrow in the map (bottom right) and by the colour choice (the darker the colour, the higher the vulnerability).



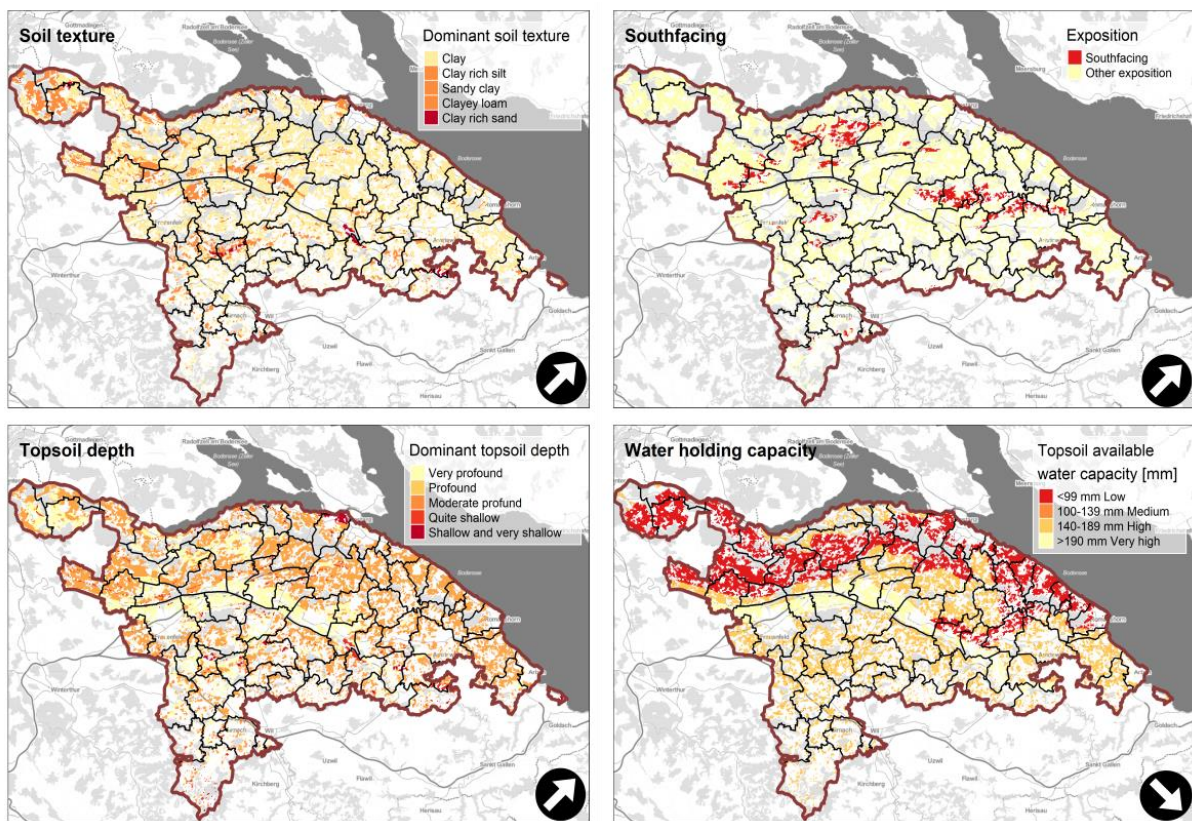

Figure S2. Continued.



**Table S5.** Thurgau LAU2 regions name, the final vulnerability values according to the equal and expert weighting scheme and their difference.

| LAU2 code | LAU2 name               | Equal weighting | Expert weighting | Diff(Expert-Equal) |
|-----------|-------------------------|-----------------|------------------|--------------------|
| 816       | Homburg                 | 0.297           | 0.236            | 0.061              |
| 846       | Raperswilten            | 0.348           | 0.287            | 0.060              |
| 811       | Herdern                 | 0.309           | 0.250            | 0.059              |
| 536       | Basadingen-Schlattingen | 0.269           | 0.214            | 0.054              |
| 701       | Wäldi                   | 0.296           | 0.247            | 0.049              |
| 821       | Hüttwilen               | 0.275           | 0.227            | 0.047              |
| 606       | Stettfurt               | 0.250           | 0.207            | 0.044              |
| 546       | Schlatt (TG)            | 0.231           | 0.188            | 0.043              |
| 601       | Neunforn                | 0.260           | 0.222            | 0.038              |
| 616       | Uesslingen-Buch         | 0.280           | 0.242            | 0.038              |
| 806       | Eschenz                 | 0.209           | 0.172            | 0.037              |
| 841       | Pfyn                    | 0.227           | 0.191            | 0.036              |
| 871       | Wagenhausen             | 0.209           | 0.173            | 0.036              |
| 571       | Gachnang                | 0.208           | 0.173            | 0.034              |
| 611       | Thundorf                | 0.156           | 0.122            | 0.033              |
| 591       | Matzingen               | 0.181           | 0.150            | 0.031              |
| 681       | Langrickenbach          | 0.216           | 0.187            | 0.029              |
| 666       | Kemmental               | 0.262           | 0.233            | 0.029              |
| 621       | Warth-Weiningen         | 0.209           | 0.184            | 0.025              |
| 683       | Lengwil                 | 0.232           | 0.208            | 0.024              |
| 831       | Müllheim                | 0.160           | 0.141            | 0.019              |
| 656       | Güttingen               | 0.207           | 0.188            | 0.019              |
| 741       | Lommis                  | 0.270           | 0.251            | 0.019              |
| 696       | Tägerwilen              | 0.214           | 0.195            | 0.019              |
| 561       | Felben-Wellhausen       | 0.160           | 0.142            | 0.018              |
| 545       | Diessenhofen            | 0.164           | 0.147            | 0.017              |
| 711       | Affeltrangen            | 0.199           | 0.186            | 0.013              |
| 566       | Frauenfeld              | 0.108           | 0.097            | 0.011              |
| 646       | Ermatingen              | 0.162           | 0.151            | 0.011              |
| 446       | Sommeri                 | 0.202           | 0.192            | 0.010              |
| 641       | Altnau                  | 0.256           | 0.247            | 0.009              |
| 691       | Münsterlingen           | 0.237           | 0.228            | 0.009              |
| 643       | Bottighofen             | 0.133           | 0.124            | 0.009              |
| 590       | Hüttingen               | 0.092           | 0.083            | 0.009              |
| 724       | Eschlikon               | 0.134           | 0.128            | 0.006              |
| 851       | Salenstein              | 0.131           | 0.126            | 0.006              |
| 776       | Tobel-Tägerschen        | 0.145           | 0.139            | 0.005              |
| 756       | Schönholzerswilen       | 0.145           | 0.140            | 0.005              |
| 723       | Braunau                 | 0.113           | 0.109            | 0.004              |
| 791       | Wuppenau                | 0.072           | 0.068            | 0.004              |
| 826       | Mammern                 | 0.132           | 0.129            | 0.004              |
| 476       | Erlen                   | 0.215           | 0.212            | 0.003              |
| 671       | Kreuzlingen             | 0.077           | 0.075            | 0.003              |
| 551       | Aadorf                  | 0.137           | 0.135            | 0.002              |
| 716       | Bettwiesen              | 0.063           | 0.061            | 0.002              |
| 864       | Steckborn               | 0.091           | 0.089            | 0.002              |
| 911       | Bürglen                 | 0.245           | 0.244            | 0.001              |
| 921       | Bussnang                | 0.208           | 0.207            | 0.001              |
| 781       | Wängi                   | 0.135           | 0.133            | 0.001              |

**Table S5.** Continued.

| LAU2 code | LAU2 name               | Equal weighting        | Expert weighting | Diff(Expert-Equal)           |        |
|-----------|-------------------------|------------------------|------------------|------------------------------|--------|
| 746       | Münchwilen (TG)         | <div><div></div></div> | 0.111            | <div><div></div></div> 0.110 | 0.001  |
| 786       | Wilen (TG)              | <div><div></div></div> | 0.062            | <div><div></div></div> 0.062 | 0.000  |
| 951       | Wigoltingen             | <div><div></div></div> | 0.256            | <div><div></div></div> 0.256 | 0.000  |
| 901       | Birwinken               | <div><div></div></div> | 0.218            | <div><div></div></div> 0.219 | 0.000  |
| 721       | Bichelsee-Balterswil    | <div><div></div></div> | 0.050            | <div><div></div></div> 0.050 | -0.001 |
| 751       | Rickenbach (TG)         | <div><div></div></div> | 0.088            | <div><div></div></div> 0.089 | -0.001 |
| 471       | Bischofszell            | <div><div></div></div> | 0.113            | <div><div></div></div> 0.115 | -0.002 |
| 436       | Romanshorn              | <div><div></div></div> | 0.111            | <div><div></div></div> 0.113 | -0.003 |
| 461       | Amriswil                | <div><div></div></div> | 0.145            | <div><div></div></div> 0.148 | -0.003 |
| 881       | Amlikon-Bissegg         | <div><div></div></div> | 0.172            | <div><div></div></div> 0.175 | -0.003 |
| 506       | Sulgen                  | <div><div></div></div> | 0.197            | <div><div></div></div> 0.201 | -0.004 |
| 431       | Roggwil (TG)            | <div><div></div></div> | 0.162            | <div><div></div></div> 0.166 | -0.004 |
| 761       | Sirnach                 | <div><div></div></div> | 0.081            | <div><div></div></div> 0.086 | -0.004 |
| 416       | Hefenhofen              | <div><div></div></div> | 0.217            | <div><div></div></div> 0.222 | -0.005 |
| 501       | Kradolf-Schönenberg     | <div><div></div></div> | 0.139            | <div><div></div></div> 0.144 | -0.005 |
| 726       | Fischingen              | <div><div></div></div> | 0.045            | <div><div></div></div> 0.050 | -0.006 |
| 486       | Hauptwil-Gottshaus      | <div><div></div></div> | 0.102            | <div><div></div></div> 0.108 | -0.006 |
| 511       | Zihlschlacht-Sitterdorf | <div><div></div></div> | 0.161            | <div><div></div></div> 0.168 | -0.007 |
| 421       | Horn                    | <div><div></div></div> | 0.083            | <div><div></div></div> 0.091 | -0.007 |
| 426       | Kesswil                 | <div><div></div></div> | 0.244            | <div><div></div></div> 0.251 | -0.007 |
| 941       | Märstetten              | <div><div></div></div> | 0.209            | <div><div></div></div> 0.217 | -0.007 |
| 401       | Arbon                   | <div><div></div></div> | 0.075            | <div><div></div></div> 0.084 | -0.009 |
| 891       | Berg (TG)               | <div><div></div></div> | 0.264            | <div><div></div></div> 0.273 | -0.009 |
| 495       | Hohentannen             | <div><div></div></div> | 0.121            | <div><div></div></div> 0.131 | -0.010 |
| 801       | Berlingen               | <div><div></div></div> | 0.063            | <div><div></div></div> 0.074 | -0.011 |
| 451       | Uttwil                  | <div><div></div></div> | 0.145            | <div><div></div></div> 0.160 | -0.015 |
| 651       | Gottlieben              | <div><div></div></div> | 0.120            | <div><div></div></div> 0.136 | -0.016 |
| 411       | Egnach                  | <div><div></div></div> | 0.191            | <div><div></div></div> 0.208 | -0.017 |
| 441       | Salmsach                | <div><div></div></div> | 0.217            | <div><div></div></div> 0.235 | -0.018 |
| 406       | Dozwil                  | <div><div></div></div> | 0.244            | <div><div></div></div> 0.263 | -0.019 |
| 946       | Weinfelden              | <div><div></div></div> | 0.161            | <div><div></div></div> 0.181 | -0.020 |

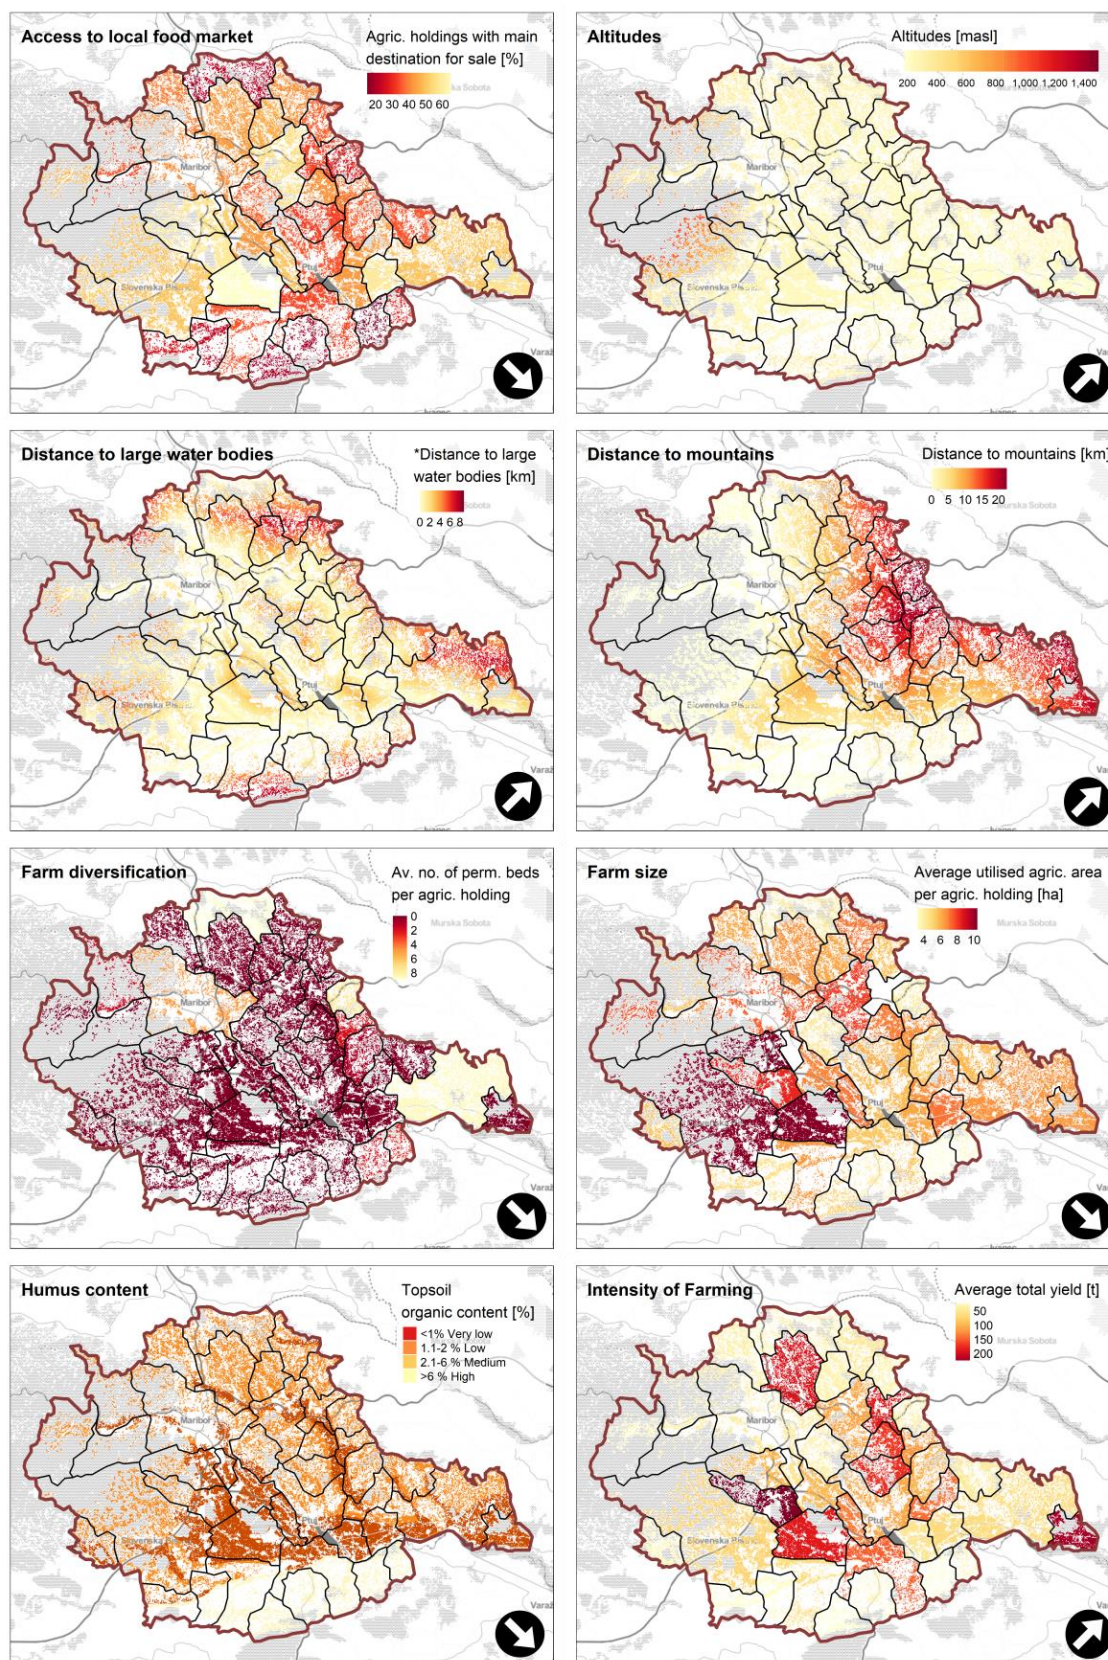

**Figure S3.** Podravska's factors (bold title) and the selected indicators used for the calculation of the vulnerability maps (see Table1, Fig. 5) and masked with agricultural used land. The factor's increasing or decreasing effect on the vulnerability is indicated by the arrow in the map (bottom right) and by the colour choice (the darker the colour, the higher the vulnerability).



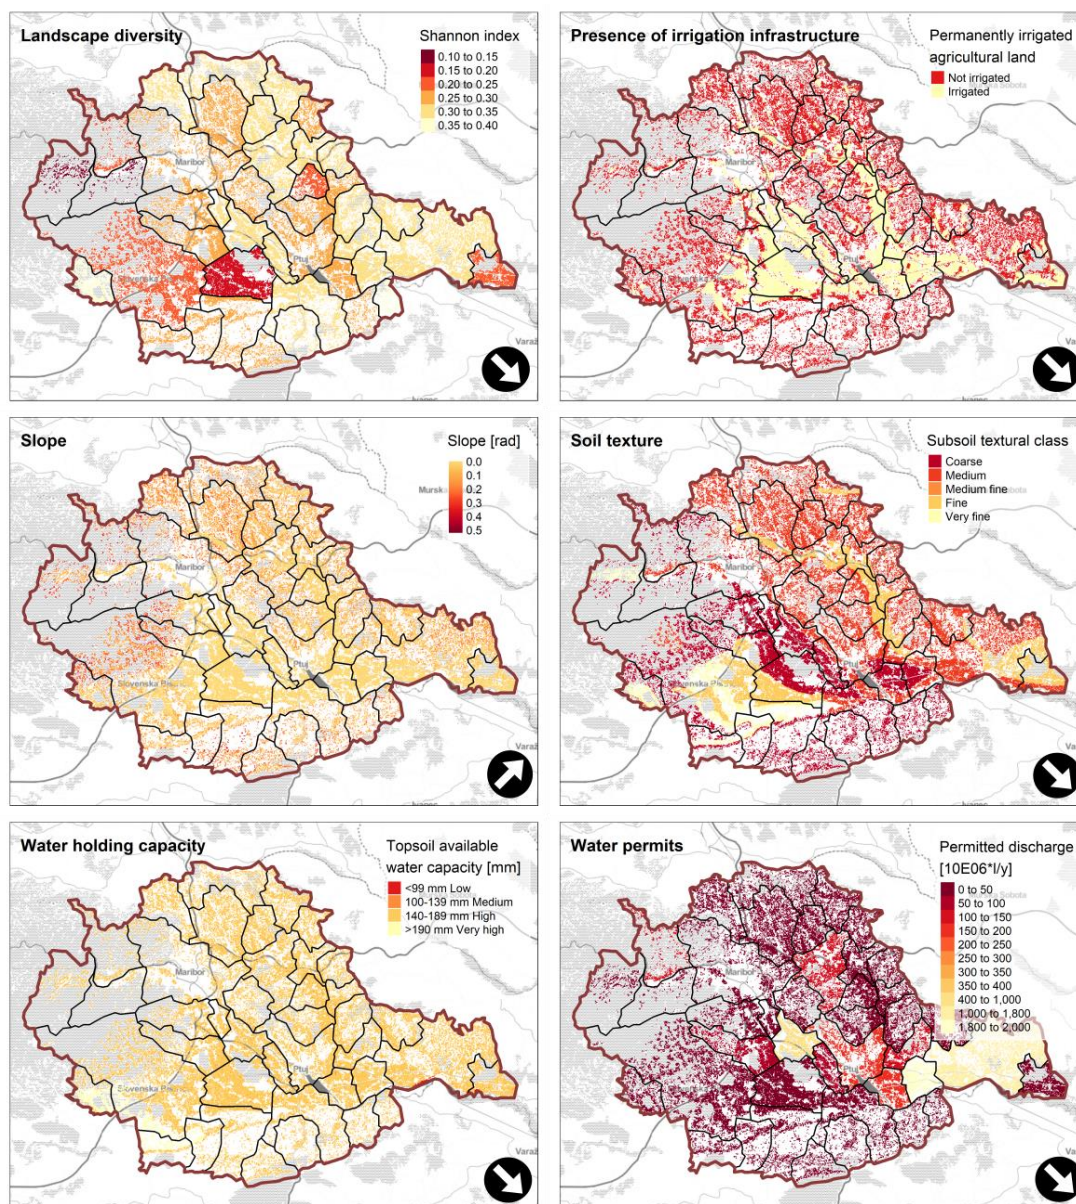

Figure S3. Continued.

**Table S6.** Podravska LAU2 regions name, the final vulnerability values according to the equal and expert weighting scheme and their difference.

| LAU2 code | LAU2 name                        | Equal weighting | Expert weighting | Diff(Expert-Equal) |
|-----------|----------------------------------|-----------------|------------------|--------------------|
| 35        | Sveti Jurij v Slov. gorica       | 0.283           | 0.349            | 0.066              |
| 7         | Gorišnica                        | 0.172           | 0.228            | 0.056              |
| 12        | Kungota                          | 0.174           | 0.226            | 0.052              |
| 1         | Benedikt                         | 0.269           | 0.321            | 0.052              |
| 31        | Starše                           | 0.189           | 0.239            | 0.05               |
| 19        | Miklavž na Dravskem Polju        | 0.156           | 0.206            | 0.05               |
| 8         | Hajdina                          | 0.233           | 0.283            | 0.05               |
| 36        | Sveti Tomaž                      | 0.242           | 0.291            | 0.049              |
| 32        | Sveta Ana                        | 0.238           | 0.287            | 0.049              |
| 18        | Markovci                         | 0.214           | 0.261            | 0.047              |
| 20        | Oplotnica                        | 0.137           | 0.183            | 0.046              |
| 22        | Pesnica                          | 0.251           | 0.294            | 0.043              |
| 39        | Videm                            | 0.191           | 0.233            | 0.042              |
| 41        | Žetale                           | 0.149           | 0.188            | 0.039              |
| 33        | Sveta Trojica v Slov. gorica     | 0.241           | 0.279            | 0.038              |
| 9         | Hoče – Slivnica                  | 0.123           | 0.161            | 0.038              |
| 6         | Duplek                           | 0.166           | 0.203            | 0.037              |
| 24        | Poljčane                         | 0.099           | 0.135            | 0.036              |
| 13        | Lenart                           | 0.2             | 0.236            | 0.036              |
| 40        | Zavrč                            | 0.136           | 0.172            | 0.036              |
| 10        | Juršinci                         | 0.221           | 0.254            | 0.033              |
| 25        | Ptuj                             | 0.185           | 0.218            | 0.033              |
| 3         | Cirkulane                        | 0.129           | 0.162            | 0.033              |
| 16        | Makole                           | 0.112           | 0.145            | 0.033              |
| 23        | Podlehnik                        | 0.109           | 0.142            | 0.033              |
| 5         | Dornava                          | 0.224           | 0.255            | 0.031              |
| 26        | Rače–Fram                        | 0.197           | 0.228            | 0.031              |
| 4         | Destrnik                         | 0.27            | 0.301            | 0.031              |
| 15        | Majšperk                         | 0.128           | 0.157            | 0.029              |
| 29        | Slovenska Bistrica               | 0.123           | 0.15             | 0.027              |
| 21        | Ormož                            | 0.15            | 0.174            | 0.024              |
| 37        | Šentilj                          | 0.137           | 0.161            | 0.024              |
| 28        | Selnica ob Dravi                 | 0.075           | 0.095            | 0.02               |
| 2         | Cerkvenjak                       | 0.199           | 0.219            | 0.02               |
| 38        | Trnovska vas                     | 0.293           | 0.312            | 0.019              |
| 17        | Maribor                          | 0.079           | 0.097            | 0.018              |
| 34        | Sveti Andraž v Slovenskih gorica | 0.263           | 0.28             | 0.017              |
| 14        | Lovrenc na Pohorju               | 0.041           | 0.049            | 0.008              |
| 27        | Ruše                             | 0.032           | 0.04             | 0.008              |
| 11        | Kidričevo                        | 0.223           | 0.229            | 0.006              |
| 30        | Središče ob Dravi                | 0.232           | 0.233            | 0.001              |



## References

Amt für Geoinformation Thurgau: Geoinformation for the Kanton Thurgau, <https://geoinformation.tg.ch/>, last access: 15 March 2022.

CLC: Copernicus Land Monitoring Service - Corine Land Cover, <https://land.copernicus.eu/pan-european/corine-land-cover/>, last access: 15 June 2022.

EU-DEM: Copernicus Land Monitoring Service - EU-DEM, <https://land.copernicus.eu/imagery-in-situ/eu-dem/eu-dem-v1.1/view>, last access: 15 March 2022.

EU-Hydro: EU-Hydro – River Network Database, Version 1.3, <https://land.copernicus.eu/imagery-in-situ/eu-hydro/eu-hydro-river-network-database?tab=mapview>, last access: 15 March 2022.

European Mountain Areas: European Mountain Areas - Version 1: <https://www.eea.europa.eu/data-and-maps/data/european-mountain-areas>, last access: 15 March 2022.

FOEN: Federal Office for the Environment: Federal Centre of Excellence for the Environment, available at: <https://www.bafu.admin.ch/bafu/en/home.html>, last access: 2022.

INSPIRE: Slovenian Data Portal, <https://eprostor.gov.si>, last access: 15 March 2022.

SFSO: Swiss Federal Statistical Office: Statistical data on Switzerland, <https://www.bfs.admin.ch>, last access: 15 March 2022.

SURS: Statistical Office of the Republic of Slovenia: Statistical data provided by SURS, <https://www.stat.si/StatWeb/>, last access: 15 March 2022.
